# Supplementary material for: Decoding key cell sub-populations and molecular alterations in glioblastoma at recurrence by single-cell analysis
Source: PubMed Central journal article supplement (PMC10391841; doi:10.1186/s40478-023-01613-x), 2023-07-31

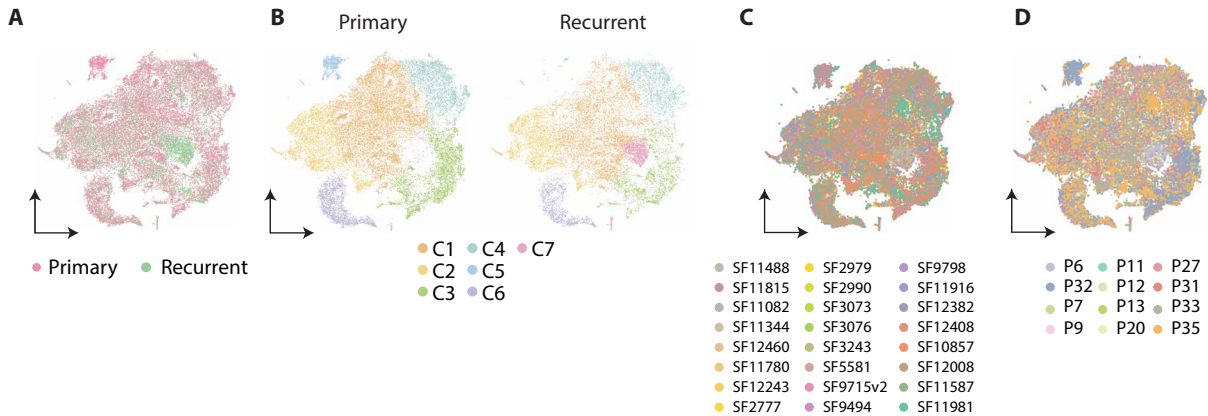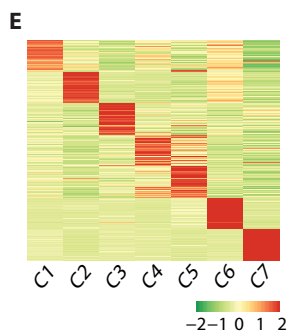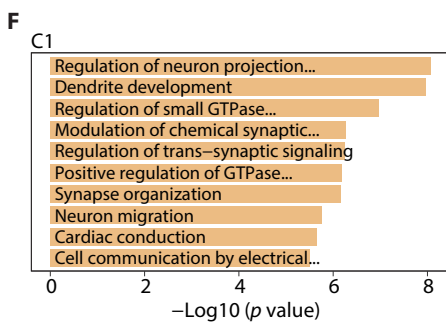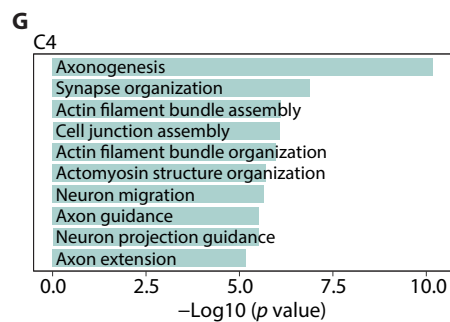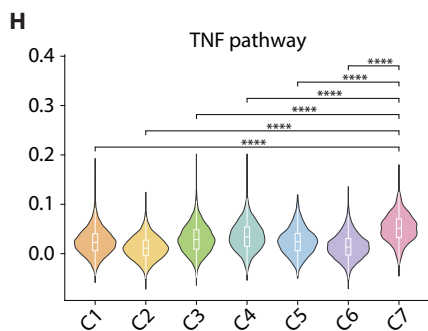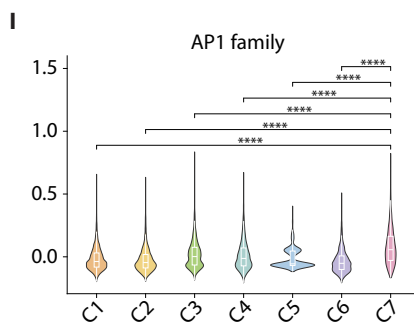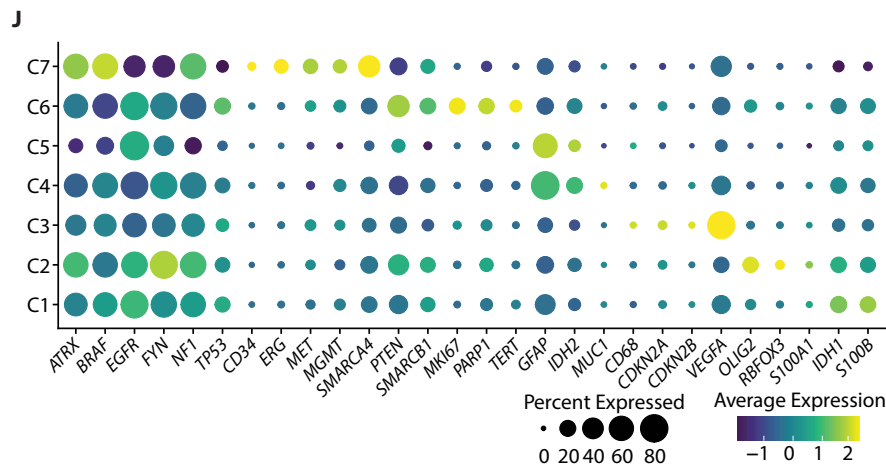

Supplement: 40478_2023_1613_MOESM3_ESM.pdf [file 40478_2023_1613_MOESM3_ESM.pdf]
